# Supplementary material
Source: publisher figshare collection journal article supplement (https://acs.figshare.com/ndownloader/files/3591393)
Supplement: Supplementary file 1 [file 3591393]

## Supporting Information

### Efficient and Robust Heteronuclear Cross-Polarization for High-Speed-Spinning Biological Solid-State NMR Spectroscopy

Sheetal Jain, Morten Bjerring, and Niels Chr. Nielsen\*

Center for Insoluble Protein Structures (inSPIN), Interdisciplinary Nanoscience Center (iNANO) and Department of Chemistry, Aarhus University, DK-8000 Aarhus C, Denmark.

\*Corresponding author: [ncn@inano.au.dk](mailto:ncn@inano.au.dk)

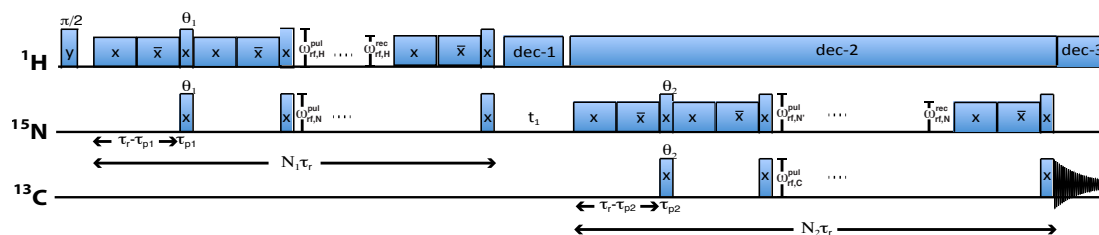

**Figure S1.** Detailed 2D pulse sequence for NCA/NCO experiments outlining typical  $^1\text{H} \rightarrow ^{15}\text{N}$  (before the  $t_1$  period) and  $^{15}\text{N} \rightarrow ^{13}\text{C}$  (after the  $t_1$  period) elements using  $^{\text{RESPIRATION}}\text{CP}$ . The initial  $(\pi/2)_y$  pulse generates  $x$ -phase coherence on the  $^1\text{H}$  spins, which in the first element is transformed to  $x$ -phase coherence on the  $^{15}\text{N}$  spins, which subsequently is transferred to  $x$ -phase coherence on the  $^{13}\text{C}$  spins. Each  $^{\text{RESPIRATION}}\text{CP}$  element contains the element in Fig. 1a repeated  $N_1$  and  $N_2$  rotor periods for the  $^1\text{H} \rightarrow ^{15}\text{N}$  and  $^{15}\text{N} \rightarrow ^{13}\text{C}$  coherence transfers, respectively, with each rotor period contain one small-flip-angle pulse on each channel (upon irradiation in several rotor periods these takes the form of a  $^{\text{RESPIRATION}}\text{pulse}^1$  on each channel interleaved with phase-alternated CW irradiation on one of the rf channels for dipolar recoupling). For each rotor period the length of the CW irradiation (half of it with phase  $x$ , half of it with phase  $-x$ ) correspond to a rotor period minus the length of the small flip-angle pulse ( $\theta$ ).

#### 1. Experiments

All experiments were performed on a Bruker Avance 400 (9.4 T, 400 MHz for  $^1\text{H}$ ) wide-bore NMR spectrometer equipped with a standard triple-resonance 2.5 mm MAS probe. The spectra were acquired using 30 kHz sample spinning, 3 s repetition delay, 122 kHz decoupling during  $^{15}\text{N} \rightarrow ^{13}\text{C}$  coherence transfer (marked “dec-2” in Fig. S1; although the experiments also works without decoupling, this provided the most representative case relative to standard experiments in the field), and 139 kHz decoupling during acquisition (marked “dec-3 in Fig. S1). The experiments in Figs. 1d and 1e used 1024 scans, with the standard CP spectrum (red) in Fig. 1d recorded using  $^1\text{H}$ - $^{15}\text{N}$  cross-polarization with rf field strengths of 70 (average) and 40 kHz on  $^1\text{H}$  and  $^{15}\text{N}$ , respectively, with a 80-100% ramp<sup>2</sup> at the  $^1\text{H}$  channel during the 350  $\mu\text{s}$  contact time. The  $^{\text{RESPIRATION}}\text{CP}$  spectrum (red) in Fig. 1d was recorded using 60 kHz rf field strength on the  $^1\text{H}$  channel for recoupling ( $\omega_{\text{rf},\text{H}}^{\text{rec}} / (2\pi)$  in the notation of Fig. S1), and also with 60 kHz rf field strength for each of the 3.5  $\mu\text{s}$  ( $\theta \approx 75^\circ$ )  $^{\text{RESPIRATION}}$

pulses<sup>1</sup> on both the <sup>1</sup>H and <sup>15</sup>N rf channels (one pulse per rotor period of flip-angle  $\theta_1$  and amplitude  $\omega_{rf,H}^{pul} / (2\pi) = \omega_{rf,N}^{pul} / (2\pi) = 60$  kHz as illustrated for the <sup>1</sup>H→<sup>15</sup>N element in Fig. S1). The mixing time was  $N=6$  rotor periods ( $N_1$  in Fig. S1), corresponding to 200  $\mu$ s. The <sup>15</sup>N→<sup>13</sup>C coherence transfers in Fig. 1e were recorded using a carefully optimized adiabatic variant<sup>3</sup> of the DCP experiment<sup>4</sup> (a tangential shape with  $\beta=-500$ ,  $\Delta=2300$  was applied on the <sup>15</sup>N channel; similar shapes were tried for <sup>13</sup>C channel also but without improving the efficiency) with average rf field strengths of 35 and 65 kHz on the <sup>15</sup>N and <sup>13</sup>C rf channels during the 3 ms mixing time. For a volume restricted sample (sample extending over the central 2 mm in the axial dimension), the adiabatic DCP experiment provided 64% transfer relative to a corresponding direct-transfer <sup>1</sup>H-<sup>13</sup>C CP/MAS experiment, a number which is reduced to 40% for a full rotor (sample extending over 8 mm in the axial dimension; this dimension was used for all experiments presented). The *RESPIRATION*CP experiment for the <sup>15</sup>N-<sup>13</sup>C transfer used phase-alternated CW irradiation on the <sup>15</sup>N rf channel with amplitude of 30 kHz, while the *RESPIRATION* pulses on the <sup>15</sup>N and <sup>13</sup>C rf channels used 58 kHz (0.9  $\mu$ s duration; i.e.,  $\theta_2 \approx 19^\circ$  using the notation in Fig. S1). The mixing time was  $N=60$  rotor periods ( $N_2$  in Fig. S1), corresponding to 2 ms.

The experiments in Fig. 2g-j used the following parameters. The rf field strengths for the different sequences were varied in a range of [-10,10] kHz relative to the optimum values. For <sup>1</sup>H→<sup>15</sup>N transfers, the rf field strengths on the <sup>1</sup>H channel (Fig. 2g) were varied around 70 kHz in case of ramped CP (red) and around 60 kHz for the *RESPIRATION*CP (blue). On the <sup>15</sup>N channel (Fig. 2h) the center is 40 kHz for the ramped CP (Red) and 60 kHz for *RESPIRATION*CP (blue). In Figs. 2i and 2j respectively, the rf field strengths on <sup>15</sup>N and <sup>13</sup>C were varied during the <sup>15</sup>N→<sup>13</sup>C transfer centered around 35 and 30 kHz on <sup>15</sup>N for the adiabatic DCP and *RESPIRATION*CP, respectively, and around 65 and 58 kHz on the <sup>13</sup>C channel. The remaining experimental parameters were kept same as in Fig. 1.

In Fig. 3, the resonance-offset dependencies are shown by both simulations and experimental results demonstrating the performances of the various pulse sequences over a range of 20 kHz. The relevant protein/peptide chemical shift ranges in kHz for 400 and 800 MHz spectrometer conditions are shown by the bar and dashed bar respectively. At 800 MHz these ranges (in kHz) are [-2, 2], [-2.5, 2.5], [-1.4, 1.4] and [-1.65, 1.65], respectively, for the <sup>1</sup>H, <sup>13</sup>C $\alpha$ , <sup>13</sup>C' and <sup>15</sup>N.

The two 2D experiments in Fig. 4 were recorded with the same optimized parameters as in Fig. 1 using 64 increments in the indirect dimension and with 772 scans per increment.

## 2. Numerical simulations

All numerical simulations were conducted using the open-source SIMPSON simulation program<sup>5-7</sup> using typical amide <sup>1</sup>H, <sup>13</sup>C $\alpha$ , and amide <sup>15</sup>N chemical shielding tensors and heteronuclear dipolar and  $J$  couplings as given in the SIMMOL paper.<sup>8</sup> The simulations used 20 to 144 *REPULSION*  $\alpha,\beta$  crystallite angles<sup>9</sup> and 5-18  $\gamma$ -angles distributed using  $\gamma$ -COMPPUTE.<sup>10</sup> All simulations presented correspond to 9.4 T (400 MHz resonance frequency for <sup>1</sup>H) static field and  $\omega_r/2\pi=30$  kHz sample spinning.

The *RESPIRATION*CP simulations in Fig. 1c use phase-alternated CW irradiation with amplitude  $\omega_{\text{rf}}=2\omega_r$  at the  $^1\text{H}$  channel for  $^1\text{H}\rightarrow^{15}\text{N}$  step and at the  $^{13}\text{C}$  channel for the  $^{15}\text{N}\rightarrow^{13}\text{C}$  step, 2  $\mu\text{s}$  interleaving rf pulses of amplitude 120 kHz (one pulse of flip-angle  $\theta \approx 90^\circ$  on each channel per rotor period; virtually identical results are obtained using substantially lower rf amplitudes on these pulses, e.g., 75 kHz ( $\theta \approx 54^\circ$ ) as used in the Fig. 3 simulations). The CP and DCP simulations in Fig. 1c uses constant amplitude rf irradiation with amplitude  $\omega_{\text{rf}}=2.5\omega_r$  and  $\omega_{\text{rf}}=1.5\omega_r$  on  $^1\text{H}$  and  $^{15}\text{N}$ , respectively, for the  $^1\text{H}\rightarrow^{15}\text{N}$  transfer and  $\omega_{\text{rf}}=1.5\omega_r$  and  $\omega_{\text{rf}}=2.5\omega_r$  on  $^{15}\text{N}$  and  $^{13}\text{C}$ , respectively, for the  $^{15}\text{N}\rightarrow^{13}\text{C}$  transfer.

The *RESPIRATION*CP simulations in Figs. 2a-2d use phase-alternated CW irradiation on the  $^1\text{H}$  channel for the  $^1\text{H}\rightarrow^{15}\text{N}$  transfer ( $N=7$  rotor period mixing) and on the  $^{13}\text{C}$  channel for the  $^{15}\text{N}\rightarrow^{13}\text{C}$  transfer ( $N=68$  rotor period mixing). The *RESPIRATION* pulses (one pulse on each channel per rotor pulse) were of duration 2  $\mu\text{s}$  implying that the vertical axes in Figs. 2a and 2b correspond to flip angles of  $\theta = 0^\circ$  to  $\theta = 180^\circ$ ). The DCP simulations in Figs. 2e and 2f use mixing times corresponding to 5 and 44 rotor periods, respectively.

The *RESPIRATION*CP simulation in Fig. 3a uses CW irradiation ( $\omega_{\text{rf}}=2\omega_r$ ) on the  $^1\text{H}$  channel ( $N=6$  rotor period mixing) and 75 kHz rf field strength for the 2  $\mu\text{s}$  rf pulses (i.e.,  $\theta \approx 54^\circ$ ; we note that the broadbandedness in the  $^{15}\text{N}$  dimension increases with increasing power on these pulses). For Fig. 3d the CW irradiation ( $\omega_{\text{rf}}=2\omega_r$ ) is on the  $^{13}\text{C}$  rf channel ( $N=68$  rotor period mixing), while in Fig. 3f the CW irradiation is on the  $^{15}\text{N}$  channel – in both cases 2  $\mu\text{s}$  rf pulses of 75 kHz amplitude is used (i.e.,  $\theta \approx 54^\circ$ ).

## Acknowledgements

We acknowledge support from the Danish National Research Foundation and the FP7 BIONMR project.

## References:

- (1) Wei, D.; Akbey, Ü.; Paaske, B.; Oschkinat, H.; Reif, B.; Bjerring, M.; Nielsen, N. C. Optimal 2H Rf Pulses and 2H- $^{13}\text{C}$  Cross-Polarization Methods for Solid-State 2H MAS NMR of Perdeuterated Proteins. *J. Phys. Chem. Lett.* **2011**, *2*, 1289-1294.
- (2) Metz, G.; Wu, X. L.; Smith, S. O. Ramped-Amplitude Cross-Polarization in Magic-Angle-Spinning Nmr. *J. Magn. Reson. Ser. A* **1994**, *110*, 219-227.
- (3) Hediger, S.; Meier, B. H.; Kurur, N. D.; Bodenhausen, G.; Ernst, R. R. Nmr Cross-Polarization by Adiabatic Passage through the Hartmann-Hahn Condition (Aphh). *Chem. Phys. Lett.* **1994**, *223*, 283-288.
- (4) Schaefer, J.; McKay, R. A.; Stejskal, E. O. Double-Cross-Polarization Nmr of Solids. *J. Magn. Reson.* **1979**, *34*, 443-447.
- (5) Vosegaard, T.; Malmendal, A.; Nielsen, N. C. The flexibility of SIMPSON and SIMMOL for numerical simulations in solid- and liquid-state NMR spectroscopy. *Monatshefte Für Chemie* **2002**, *133*, 1555-1574.
- (6) Bak, M.; Rasmussen, J. T.; Nielsen, N. C. SIMPSON: A general simulation program for solid-state NMR spectroscopy. *J. Magn. Reson.* **2000**, *147*, 296-330.
- (7) Tosner, Z.; Vosegaard, T.; Kehlet, C.; Khaneja, N.; Glaser, S. J.; Nielsen, N. C. Optimal control in NMR spectroscopy: Numerical implementation in SIMPSON. *J. Magn. Reson.* **2009**, *197*, 120-134.

- (8) Bak, M.; Schultz, R.; Vosegaard, T.; Nielsen, N. C. Specification and visualization of anisotropic interaction tensors in polypeptides and numerical simulations in biological solid-state NMR. *J. Magn. Reson.* **2002**, *154*, 28-45.
- (9) Bak, M.; Nielsen, N. C. REPULSION, a novel approach to efficient powder averaging in solid-state NMR. *J. Magn. Reson.* **1997**, *125*, 132-139.
- (10) Hohwy, M.; Bildsøe, H.; Jakobsen, H. J.; Nielsen, N. C. Efficient spectral simulations in NMR of rotating solids. The gamma-COMPUTE algorithm. *J. Magn. Reson.* **1999**, *136*, 6-14.
